# Supplementary material
Source: PubMed Central journal article supplement (PMC4134184)
Supplement: am504270c_si_001.pdf [file am504270c_si_001.pdf]

## Supporting Information

### **Synthesis of Multifunctional Magnetic NanoFlakes for Magnetic Resonance Imaging, Hyperthermia, and Targeting.**

*Antonio Cervadoro, Minjung Cho, Jaehong Key, Christy Cooper, Cinzia Stigliano, Santosh Aryal, Audrius Brazdeikis, James F. Leary, and Paolo Decuzzi\*.*

\* Corresponding Author, e-mail: [pdecuzzi@houstonmethodist.org](mailto:pdecuzzi@houstonmethodist.org)

Day 1

|                         | Size (d.nm):  | % Intensity: | St Dev (d.nm): |
|-------------------------|---------------|--------------|----------------|
| Z-Average (d.nm): 166.0 | Peak 1: 202.5 | 100.0        | 94.05          |
| PdI: 0.171              | Peak 2: 0.000 | 0.0          | 0.000          |
| Intercept: 0.922        | Peak 3: 0.000 | 0.0          | 0.000          |
| Result quality : Good   |               |              |                |

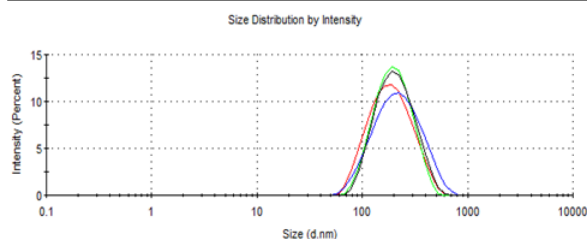

Day 5

|                         | Size (d.nm):  | % Intensity: | St Dev (d.nm): |
|-------------------------|---------------|--------------|----------------|
| Z-Average (d.nm): 154.3 | Peak 1: 176.3 | 98.6         | 75.45          |
| PdI: 0.209              | Peak 2: 5249  | 1.0          | 443.1          |
| Intercept: 0.931        | Peak 3: 34.98 | 0.4          | 4.221          |
| Result quality : Good   |               |              |                |

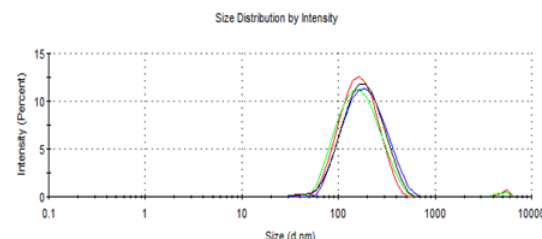

Day 2

|                         | Size (d.nm):  | % Intensity: | St Dev (d.nm): |
|-------------------------|---------------|--------------|----------------|
| Z-Average (d.nm): 152.6 | Peak 1: 185.4 | 100.0        | 85.37          |
| PdI: 0.162              | Peak 2: 0.000 | 0.0          | 0.000          |
| Intercept: 0.932        | Peak 3: 0.000 | 0.0          | 0.000          |
| Result quality : Good   |               |              |                |

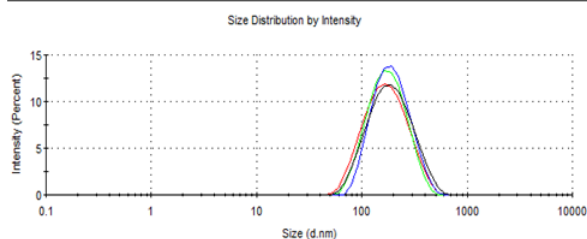

Day 6

|                         | Size (d.nm):  | % Intensity: | St Dev (d.nm): |
|-------------------------|---------------|--------------|----------------|
| Z-Average (d.nm): 146.6 | Peak 1: 165.4 | 100.0        | 68.12          |
| PdI: 0.185              | Peak 2: 0.000 | 0.0          | 0.000          |
| Intercept: 0.927        | Peak 3: 0.000 | 0.0          | 0.000          |
| Result quality : Good   |               |              |                |

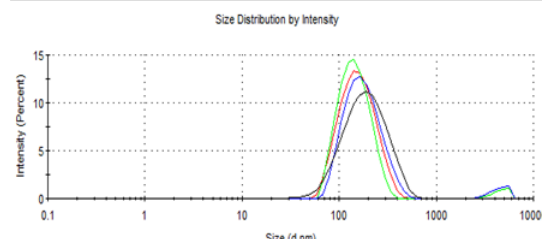

Day 3

|                         | Size (d.nm):  | % Intensity: | St Dev (d.nm): |
|-------------------------|---------------|--------------|----------------|
| Z-Average (d.nm): 144.5 | Peak 1: 177.0 | 100.0        | 87.81          |
| PdI: 0.174              | Peak 2: 0.000 | 0.0          | 0.000          |
| Intercept: 0.924        | Peak 3: 0.000 | 0.0          | 0.000          |
| Result quality : Good   |               |              |                |

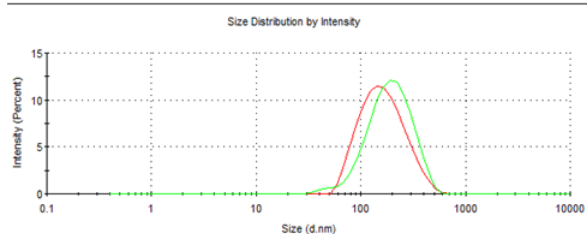

Day 7

|                         | Size (d.nm):  | % Intensity: | St Dev (d.nm): |
|-------------------------|---------------|--------------|----------------|
| Z-Average (d.nm): 144.4 | Peak 1: 170.6 | 98.7         | 76.98          |
| PdI: 0.201              | Peak 2: 4876  | 1.3          | 684.5          |
| Intercept: 0.928        | Peak 3: 0.000 | 0.0          | 0.000          |
| Result quality : Good   |               |              |                |

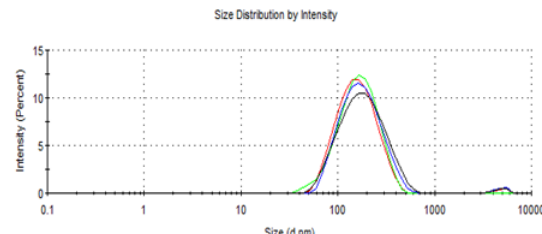

Day 4

|                         | Size (d.nm):  | % Intensity: | St Dev (d.nm): |
|-------------------------|---------------|--------------|----------------|
| Z-Average (d.nm): 162.9 | Peak 1: 195.2 | 100.0        | 82.41          |
| PdI: 0.161              | Peak 2: 0.000 | 0.0          | 0.000          |
| Intercept: 0.933        | Peak 3: 0.000 | 0.0          | 0.000          |
| Result quality : Good   |               |              |                |

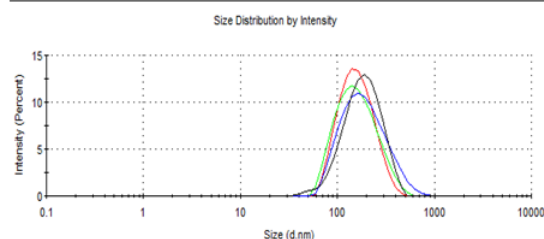

**Supp. Figure S1:** Dynamic light scattering (DLS) data on the hydrodynamic diameter and polydispersity index (*PDI*) of the MNFs in PBS, at different time points.

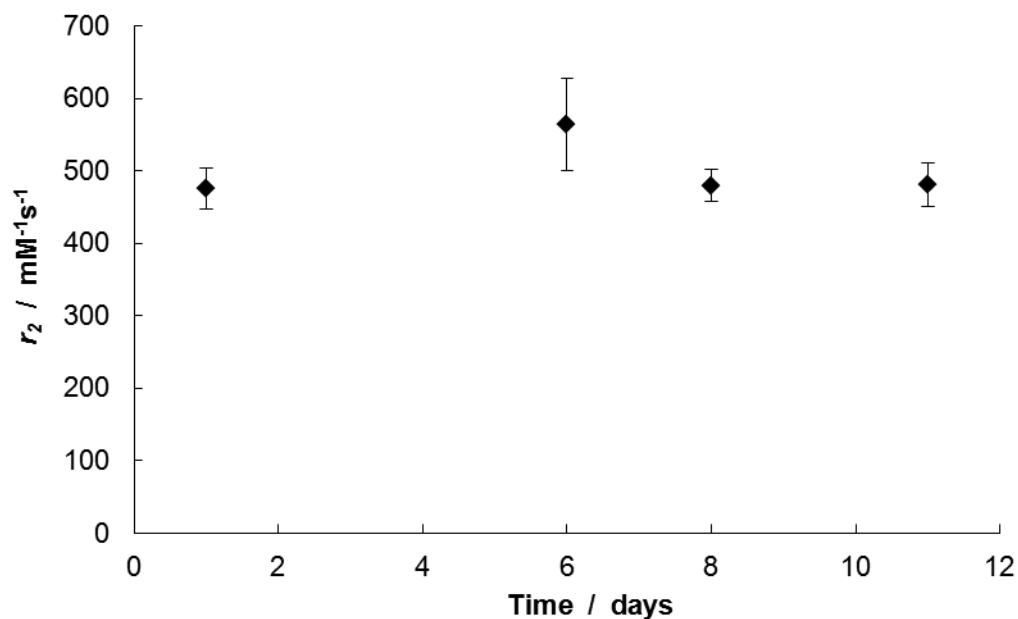

**Supp. Figure S2: Variation of the transverse relaxivity  $r_2$  over time.** The stability of MNFs over time is also demonstrated by the lack of significant variation in transverse relaxivity over 11 days post nanoparticle synthesis.

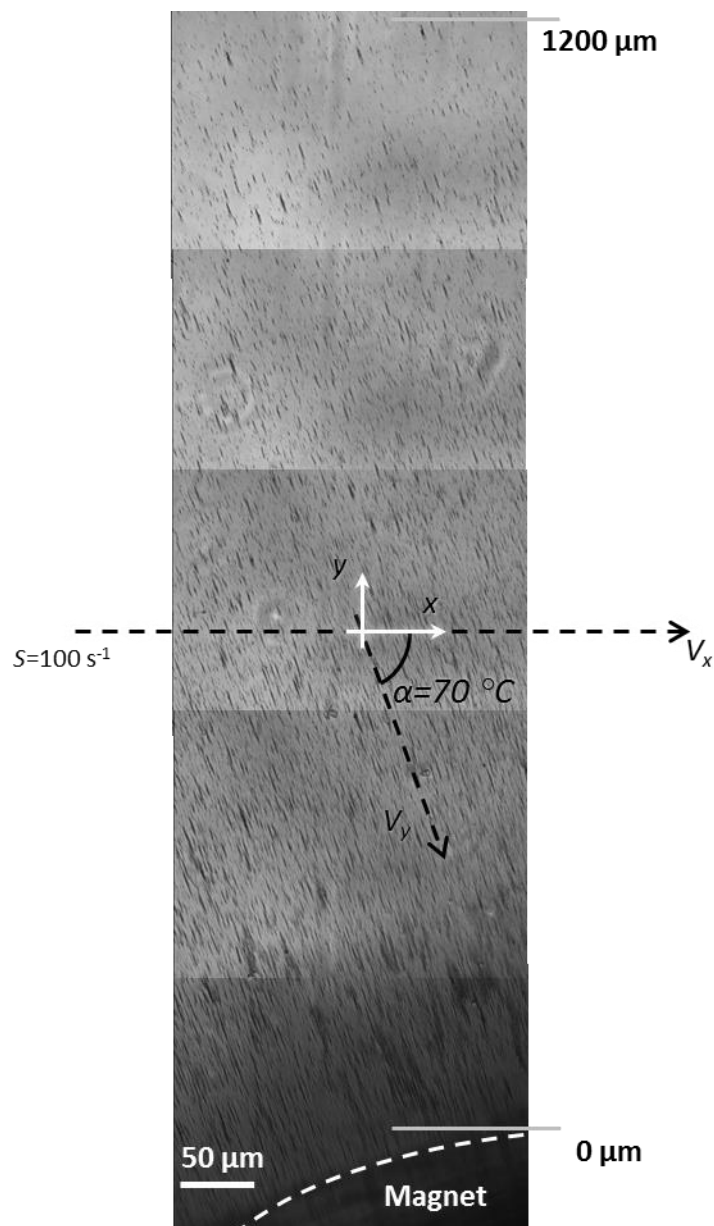

**Supp. Figure S3: Cooperative accumulation of MNFs at the bottom of the flow chamber.** Note as the MNFs tend to align radially around the magnet (bottom) along the force lines of the field. The growing needle-like architectures of the agglomerating particles demonstrates the cooperative interaction between the MNFs.

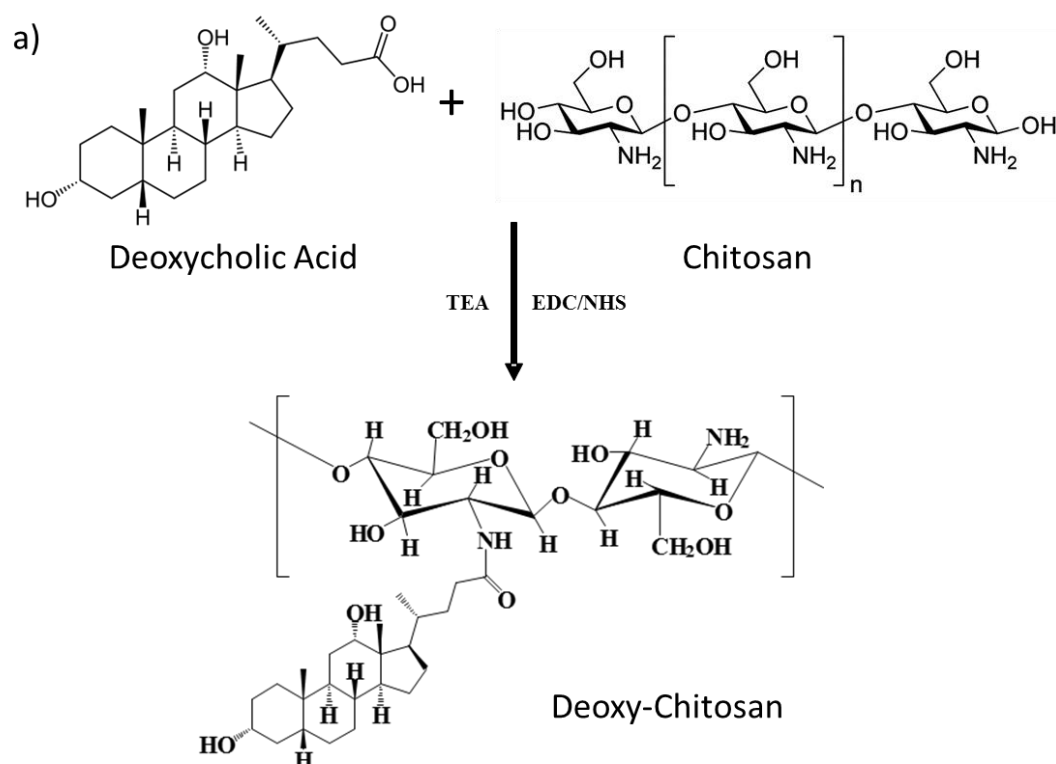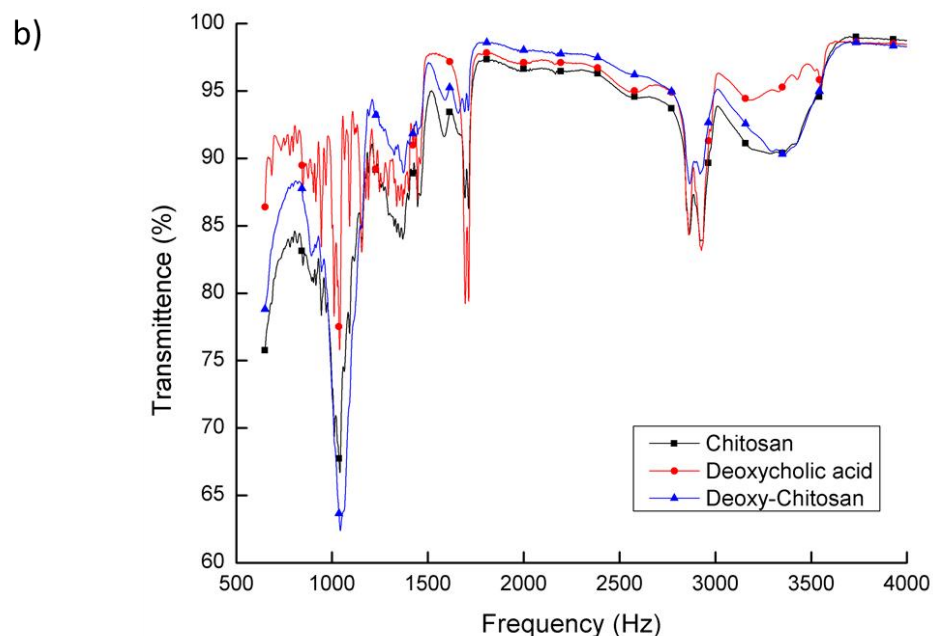

**Supp. Figure S4: a)** Schematic of Deoxy-Chitosan reaction and **b)** FT-IR spectra of chitosan, deoxycholic acid, and chitosan-deoxycholic acid conjugate. The characteristic bands, amide I ( $1656\text{ cm}^{-1}$ ), amide II ( $1593\text{ cm}^{-1}$ ), and amide III ( $1373\text{ cm}^{-1}$ ) of chitosan are intact in both chitosan and chitosan-deoxycholic acid conjugate. However, the H-bonded, N-H stretching, and O-H stretching centered at  $3500\text{ cm}^{-1}$  to  $3100\text{ cm}^{-1}$  was slightly modified to small intense band at  $3446\text{ cm}^{-1}$  along with the broad band, which reduces the extent of the H-bonding due

to the conjugation with deoxycholic acid confirms the formation of the conjugates. Likewise, the absorption of alkyl C-H stretching band of conjugate decreases as compare to that of chitosan at  $2950\text{-}2850\text{ cm}^{-1}$  is possibly due to the incorporation of alicyclic rings. In addition, the -O-H stretching band of -COOH group of dexoycholic acid at  $2570\text{ cm}^{-1}$  disappeared when conjugated to chitosan further confirms the formation of chitosan-deoxycholic acid conjugates.

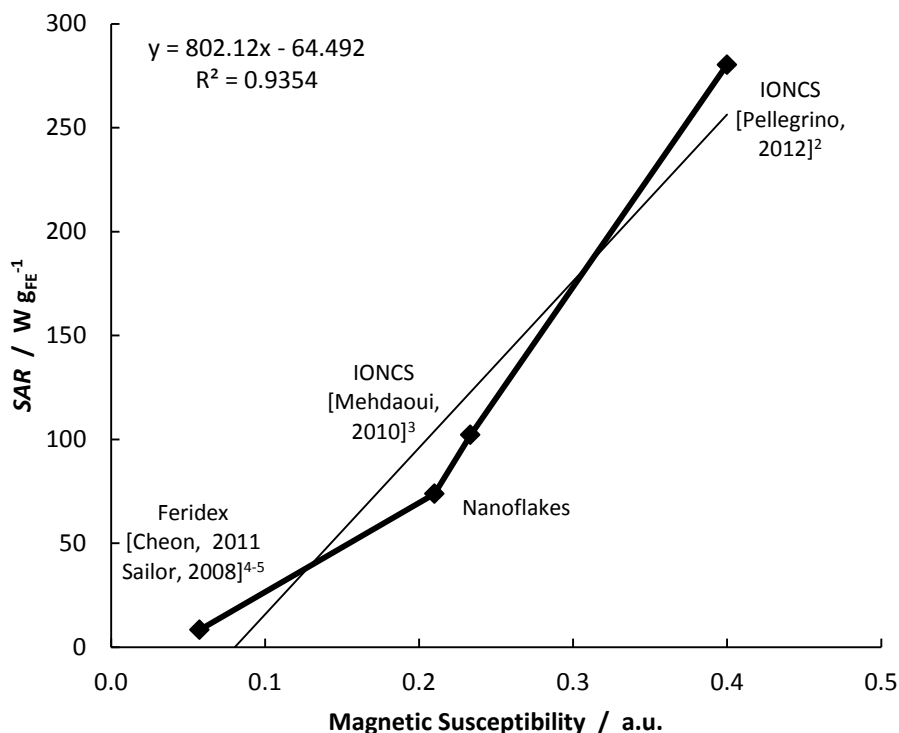

**Supp. Figure.S5: SAR vs magnetic susceptibility relationship.** The specific absorption rate for a broad class of iron oxide nanoparticles (see Figure.5 in the main text) is plotted versus the corresponding value of the magnetic susceptibility. A linear relationship is observed with a high regression coefficient of ( $R^2 = 0.8988$  for all nanoparticles;  $R^2 = 0.9354$  for all nanoparticles but the particles provided by Sigma-Aldrich). The dependance between SAR and magnetic susceptibility is well defined by the theory:<sup>1</sup>

$$SAR = \frac{P}{\rho} = \frac{\pi\mu_0}{\rho} H^2 f \frac{2\pi f \tau}{1 + (2\pi f)^2} \cdot \chi_0(M_s, H)$$

Where we have:

|         |                                |          |                          |
|---------|--------------------------------|----------|--------------------------|
| $P$     | Power loss                     | $\chi_0$ | Magnetic susceptibility  |
| $H$     | Magnetic field strength        | $\tau$   | Particle relaxation time |
| $f$     | Magnetic field frequency       | $\rho$   | Particle density         |
| $\mu_0$ | Vacuum magnetic susceptibility | $M_s$    | Saturation magnetization |

All the values have been extrapolated by the magnetization data reported by respective authors.<sup>2-5</sup>

## References

1. Rosensweig, R. E., Heating magnetic fluid with alternating magnetic field. *J. Magn. Magn. Mater.* **2002**, 252 (1-3), 370-374.
2. Guardia, P.; Di Corato, R.; Lartigue, L.; Wilhelm, C.; Espinosa, A.; Garcia-Hernandez, M.; Gazeau, F.; Manna, L.; Pellegrino, T., Water-soluble iron oxide nanocubes with high values of specific absorption rate for cancer cell hyperthermia treatment. *ACS Nano* **2012**, 6 (4), 3080-91.
3. Mehdaoui, B.; Meffre, A.; Lacroix, L. M.; Carrey, J.; Lachaize, S.; Gougeon, M.; Respaud, M.; Chaudret, B., Large specific absorption rates in the magnetic hyperthermia properties of metallic iron nanocubes. *J. Magn. Magn. Mater.* **2010**, 322 (19), L49-L52.
4. Park, J. H.; von Maltzahn, G.; Zhang, L.; Schwartz, M. P.; Ruoslahti, E.; Bhatia, S. N.; Sailor, M. J., Magnetic iron oxide nanoworms for tumor targeting and imaging. *Advanced Materials* **2008**, 20 (9), 1630-1635.
5. Lee, J. H.; Jang, J. T.; Choi, J. S.; Moon, S. H.; Noh, S. H.; Kim, J. W.; Kim, J. G.; Kim, I. S.; Park, K. I.; Cheon, J., Exchange-coupled magnetic nanoparticles for efficient heat induction. *Nat. Nanotechnol.* **2011**, 6 (7), 418-22.
